# Supplementary material
Source: PubMed Central journal article supplement (PMC548312)
Supplement: pnas_102_6_2111__1.pdf [file pnas_102_6_2111__1.pdf]

## **Supporting Text**

### **Methods**

#### **Device**

The physical device portion of Darwin X consists of a wheeled mobile base equipped with a CCD camera for vision, odometry for self-movement cues, IR transceivers for obstacle avoidance, and a front mounted, downward pointing IR transceiver to detect the hidden platform. Light-emitting diodes (LEDs) on top of Darwin X, which were detectable by two cameras placed over the enclosure, were used to track Darwin X's position.

Darwin X was equipped with a set of innate behavioral responses for exploration, obstacle avoidance, and platform detection. Its default behavior was to proceed forward for  $\approx 10$  seconds, rotate to its left, then to its right, and then choose a new heading. If Darwin X detected a large obstacle, such as a wall with its IR sensors, it would initiate an obstacle avoidance response. If it detected the hidden platform with the downward facing IR sensor, Darwin X would stop and rotate to the left and then to the right.

#### **Neural Simulation**

Darwin X's behavior is guided by a simulated nervous system modeled on the anatomy and physiology of the mammalian nervous system but, obviously, with far fewer neurons and a much less complex architecture. It consists of a number of areas labeled according to the analogous neocortical, hippocampal and subcortical brain regions. Each area contains neuronal units that can be either excitatory or inhibitory, each of which represents a local population of neurons. To distinguish modeled areas from corresponding regions in the mammalian nervous system, the simulated areas are indicated in *italics* (e.g., *IT*).

During each simulation cycle of Darwin X, sensory input is processed, the states of all neuronal units are computed, the connection strengths of all plastic connections are determined, and motor output is generated. In our experiments, execution of each simulation cycle required  $\approx 200$  ms of real time. The neural simulation was run on a BEOWULF cluster containing 12 1.4-GHz Pentium IV computers running the Linux operating system. All sensory input from the device and motor commands to the device was communicated through wireless links between the device and one of cluster's workstations. During each simulation cycle, all neuronal activities were saved on a hard disk, and Darwin X's position was recorded.

In the present experiments, the simulated nervous system contained 50 neural areas, 90,000 neuronal units, and  $\approx 1.4$  million synaptic connections. It included a visual system, a head direction system, a hippocampal formation, a basal forebrain, a value or reward system, and an action selection system. Fig. 2 shows a high-level diagram of the simulated nervous system including the various neural areas and the arrangement of

synaptic connections. Specific parameters relating to each area and to patterns of connectivity are given in Tables 2 and 3.

Visual images from Darwin X's charge-coupled device (CCD) camera were filtered for color and edges and the filtered output directly affected neural activity in area V1, which is composed of functionally segregated subareas for color and shape. The CCD camera sends  $320 \times 240$  pixel RGB video images, via an RF transmitter, to a frame grabber attached to one of the workstations running the neural simulation. The image was spatially averaged to produce an  $80 \times 60$  pixel image. Different sized Gabor filters ( $8 \times 8$ ,  $16 \times 16$ ,  $32 \times 32$ , and  $64 \times 64$ ) were used to detect vertical edges of varying widths. The output of the Gabor function mapped directly onto the neuronal units of the corresponding V1 subarea (V1-width8, V1-width16, V1-width32, and V1-width64). Color filters (red positive center with a green negative surround, red negative center with a green positive surround, blue positive with red-green negative, and blue negative with red-green positive) were applied to the image. The outputs of the color filters were mapped directly onto the neuronal units of V1-red, V1-green, V1-blue, and V1-yellow. V1 neuronal units projected retinotopically to neuronal units in V2/V4 (see Fig. 2 and Table 3).

A head direction system was modeled after areas of the rodent nervous system (e.g., anterior thalamic nuclei) that respond selectively to the animal's heading (1, 2). Neurons in these areas are often called head direction cells. Odometer information obtained from Darwin X's wheels was used to estimate current heading. This information was input into the head direction neural area (HD). Each of the 360 HD neuronal units had a cosine tuning curve, which responded maximally to a preferred heading with a tuning width of  $\pi$  radians:

$$\cos(HD_i - curr\_heading)^5; \quad (1)$$

where  $HD_i$  is a head direction cell with a preferred direction of  $(\frac{i}{360} 2\pi)$  and  $i$  ranges from 0 to 359.

The head direction cells projected topographically to an area analogous to the anterior thalamic nucleus (see  $HD \rightarrow ATN$  in Table 3 and Fig. 2) and to a motor area (see  $HD \rightarrow M_{HDG}$  in Table 3 and Fig. 2) used for selecting a new heading (see below).

The architecture of the simulated hippocampal formation was based on rodent neuroanatomy. The input streams into the hippocampus are from the associative cortical areas in the simulation (see  $ATN \rightarrow EC_{IN}$ ,  $IT \rightarrow EC_{IN}$ ,  $PR \rightarrow EC_{IN}$  in Table 3 and Fig. 2). Parameter values for the neuronal units and connections in these areas were tuned such that each cortical area (ATN, PR, and IT) had an equivalent synaptic influence on  $EC_{IN}$  (see Tables 2 and 3). The relative numbers of neuronal units in each area, and the intrinsic and extrinsic of connectivity of the hippocampus were implemented based on known anatomical measurements (3-5). The perforant path projects mainly from entorhinal cortex to the dentate gyrus but also to the CA3 and CA1 subfields (see  $EC_{IN} \rightarrow$

DG  $EC_{IN} \rightarrow CA3$ ,  $EC_{IN} \rightarrow CA3$  in Table 3 and Fig. 2). The mossy fibers (see  $DG \rightarrow CA3$  in Table 3 and Fig. 2), Schaffer collaterals (see  $CA3 \rightarrow CA1$  in Table 3 and Fig. 2), and divergent projections from the hippocampus back to cortex (see  $CA1 \rightarrow EC_{OUT} \rightarrow ATN, IT, PR$ ) in Table 3 and Fig. 2) were also reflected in the neural simulation. Moreover, the prevalent recurrent connectivity found in the hippocampal formation was included in the model (see  $EC_{IN\beta} \rightarrow EC_{OUT}$ ,  $DG \rightarrow DG$ , and  $CA3 \rightarrow CA3$  in Table 3 and Fig. 2).

There are distinct patterns of intrinsic and extrinsic, feedback and feed-forward inhibitory connections in the hippocampal circuitry (5, 6). Feedback inhibitory connections (see  $EC \rightarrow EC_{FB} \rightarrow EC$ ,  $DG \rightarrow DG_{FB} \rightarrow DG$ ,  $CA3 \rightarrow CA3_{FB} \rightarrow CA3$ ,  $CA1 \rightarrow CA1_{FB} \rightarrow CA1$  in Table 3 and Fig. 2) and feed-forward inhibitory connections (see  $EC \rightarrow DG_{FF} \rightarrow DG$ ,  $DG \rightarrow CA3_{FF} \rightarrow CA3$ ,  $CA3 \rightarrow CA1_{FF} \rightarrow CA1$  in Table 3 and Fig. 2) were included in the model. These connections were important for separating inputs and maintaining network stability.

A simplified model of the basal forebrain provided an extrinsic theta rhythm for the neural simulation. The function of the simulated basal forebrain area was to gate input into the hippocampus and keep activity levels stable. The BF area had a rhythmic activity over 13 simulation cycles:

$$BF(t) = \text{theta}(t \bmod 13); \quad (2)$$

where  $\text{theta} = \{0.01, 0.165, 0.33, 0.495, 0.66, 0.825, 1.00, 0.825, 0.66, 0.495, 0.33, 0.165, 0.01\}$ .  $BF$  projected to all hippocampal areas with inhibitory connections (see  $BF \rightarrow EC_{IN}, EC_{OUT}, DG, CA3, CA1$  in Table 3 and Fig. 2). The level of inhibition, which was adaptive, kept the activity in hippocampal regions within specific ranges:

$$\begin{aligned} \Delta sf_r(t) &= (s_r(t) - tgt_r) \\ BF_r(t) &= BF(t) + sf_r(t) \end{aligned} \quad (3)$$

where  $r$  denotes the region (i.e.,  $EC_{IN}$ ,  $EC_{OUT}$ ,  $DG$ ,  $CA3$ ,  $CA1$ ),  $sf_r(t)$  is the scale factor at time  $t$ ,  $s_r(t)$  is the percentage of active neuronal units in region  $r$  at time  $t$ ,  $tgt_r$  is the desired percentage of active units in area  $r$  ( $EC_{IN} = 10\%$ ,  $EC_{OUT} = 10\%$ ,  $DG = 20\%$ ,  $CA3 = 5\%$ , and  $CA1 = 10\%$ ), and  $BF_r(t)$  is the presynaptic neuronal unit activity for a  $BF$  to hippocampus region  $r$  connection.

Activity in the simulated value system ( $S$  in Fig. 2) signals the occurrence of salient sensory events and this activity contributes to the modulation of value-dependent connection strengths in synaptic pathways ( $CA1 \rightarrow S$  and  $CA1 \rightarrow M_{HDG}$ ). The projection from our simulated  $CA1$  to the value and goal decision areas is consistent with the connectivity between  $CA1$  and nucleus accumbens and frontal areas (7, 8). Initially,  $S$  is activated by the hidden platform IR detector (see  $R^+ \rightarrow S$  in Table 3 and Fig. 2), causing potentiation of value dependent connections, or by obstacle avoidance IR detectors (see  $R^- \rightarrow S$  in Table 3 and Fig. 2), causing depression of value dependent connections. After

experience, the value system could be activated by *CAI*. The magnitude of potentiation or depression is based on a neural implementation of temporal difference learning rule (9, 10).

$$TD(t) = \begin{cases} R^+(t) - \overline{S(t - \tau)}; & R^+ > 0 \\ \overline{S(t - \tau)} - R^-(t); & R^- > 0 \\ \overline{S(t)} - \overline{S(t - \tau)}; & otherwise \end{cases} \quad (4)$$

where  $\overline{S(t)}$  is the average activity of the value system at time  $t$ ,  $\tau$  is one theta cycle (13 simulation cycles),  $R^+$  is positive reward and equal to 1 if the brain-based device (BBD) is over the hidden platform, and  $R^-$  is negative reward and equal to 1 if the BBD is too close to a wall. The basic idea of the temporal difference rule is that learning is based on the difference between temporally successive predictions of rewards. The goal of learning is to make the learner's current prediction of expected reward match more closely the actual expected reward at the next time interval ( $\tau$ ). If the expected reward value increases over  $\tau$ , TD is positive and affected synaptic connections are potentiated, and if the change in value decreases, TD is negative and affected synaptic connections are depressed. Further details on how the temporal difference is applied to individual synaptic connections are given in *Neuronal Dynamics and Synaptic Plasticity* below.

Darwin X selected a new heading every three theta cycles (39 simulation cycles), based on activity in its motor area ( $M_{HDG}$ ). From its original heading, Darwin X would first turn counterclockwise  $60^\circ$  and wait for 3 seconds, then turn clockwise for  $60^\circ$  and wait 3 s, then another  $60^\circ$  clockwise turn and wait 3 s, and finally turn counterclockwise returning to its original heading. The average activity of  $M_{HDG}$  was calculated during the wait periods. A softmax algorithm was used to create a probability distribution for choosing a new heading:

$$p(newhdg) = \frac{\exp(40(\overline{M_{HDG}(newhdg)}))}{\sum_{h=hdg-60, hdg, hdg+60} \exp(40(\overline{M_{HDG}(h)}))} \quad (5)$$

where *newhdg* is a possible new heading for Darwin X,  $\overline{M_{HDG}(newhdg)}$  is the average activity of  $M_{HDG}$  at a possible new heading, *hdg* is the current heading, and *h* has three positions (current heading, current heading less  $60^\circ$ , current plus  $60^\circ$ ).

### Neuronal Dynamics and Synaptic Plasticity

A neuronal unit in Darwin X is simulated by a mean firing rate model, in which the mean firing rate variable of each unit corresponds to the average activity of a group of roughly 100 real neurons during a time period of  $\approx 200$  milliseconds. Synaptic connections between neural units, both within and between neuronal areas, are set to be either voltage-independent or voltage-dependent, and either plastic or non-plastic (see Table 3

and Fig. 2). Voltage-independent connections provide synaptic input regardless of postsynaptic state. Voltage-dependent connections represent the contribution of receptor types (e.g., NMDA receptors) that require postsynaptic depolarization to be activated (11, 12).

The mean firing rate ( $s$ ) of each neuronal unit ranges continuously from 0 (quiescent) to 1 (maximal firing). The state of a neuronal unit is updated as a function of its current state and contributions from voltage-independent and voltage-dependent inputs (see Fig. 2). The voltage-independent input to unit  $i$  from unit  $j$  is:

$$A_{ij}^{VI}(t) = c_{ij} s_j(t), \quad (6)$$

where  $s_j(t)$  is the activity of unit  $j$ , and  $c_{ij}$  is the connection strength from unit  $j$  to unit  $i$ . The voltage-independent postsynaptic influence,  $POST_i^{VI}$ , on unit  $i$  is calculated by summing over all of the inputs onto unit  $i$ :

$$POST_i^{VI}(t) = \varphi(POST_i^{VI}(t-1)) + (1 - \varphi) \left( \sum_{l=1}^M \sum_{j=1}^{N_l} (A_{ij}^{VI}(t)) \right); \quad (7)$$

where  $M$  is the number of different anatomically defined connection types (see Table 3),  $N_l$  is the number of connections of type  $M$  projecting to unit  $i$ , and  $\varphi$  is the persistence of synaptic input.

The voltage-dependent input to unit  $i$  from unit  $j$  is:

$$A_{ij}^{VD}(t) = \Phi(POST_i^{VI}(t)) c_{ij} s_j(t), \text{ where } \Phi(x) = \begin{cases} 0; & x < \sigma_i^{vdep} \\ x; & otherwise \end{cases}; \quad (8)$$

where  $\sigma_i^{vdep}$  is a threshold for the postsynaptic activity below which voltage-dependent connections have no effect (see Table 2).

The voltage-dependent postsynaptic influence on unit  $i$ ,  $POST_i^{VD}$ , is given by:

$$POST_i^{VD}(t) = \varphi(POST_i^{VD}(t-1)) + (1 - \varphi) \left( \sum_{l=1}^M \sum_{j=1}^{N_l} (A_{ij}^{VD}(t)) \right) \quad (9)$$

The total postsynaptic influence on neuronal unit  $i$  is given by:

$$POST_i = \sum_{j=1}^{N_{VI}} POST_j^{VI} + \sum_{k=1}^{N_{VD}} POST_k^{VD}; \quad (10)$$

The new activity is determined by the following activation function:

$$s_i(t+1) = \phi(\tanh(g_i(POST_i + \omega s_i(t))))), \text{ where } \phi(x) = \begin{cases} 0; & x < \sigma_i^{fire} \\ x; & otherwise \end{cases}; \quad (11)$$

where  $\omega$  determines the persistence of unit activity from one cycle to the next,  $g_i$  is a scaling factor, and  $\sigma_i^{fire}$  is a unit specific firing threshold. Specific parameter values for neuronal units are given in Table 2, and synaptic connections are specified in Table 3

Synaptic strengths are subject to modification according to a synaptic rule that depends on the preand postsynaptic neuronal unit activities. Plastic synaptic connections are either value-independent (see  $EC_{IN} \rightarrow DG, CA3, CA1$ ;  $DG \rightarrow CA3$ ;  $CA3 \rightarrow CA1$ ;  $CA1 \rightarrow EC_{OUT}$  in Table 3 and Fig. 2) or value-dependent (see  $CA1 \rightarrow S$ ,  $CA1 \rightarrow M_{HDG}$  in Table 3 and Fig. 2). Both of these rules are based on a modified BCM learning rule (13). Synapses between neuronal units with strongly correlated firing rates are potentiated and synapses between neuronal units with weakly correlated rates are depressed; the magnitude of change is determined as well by pre- and postsynaptic activities. The specific parameter settings for fine-scale synaptic connections are given in the equations below and Table 3.

Value-independent synaptic changes in  $c_{ij}$  are given by:

$$\Delta c_{ij}(t+1) = \eta s_i(t) s_j(t) BCM(s_i); \quad (12)$$

where  $s_i(t)$  and  $s_j(t)$  are activities of post- and presynaptic units, respectively, and  $\eta$  is a fixed learning rate. The function BCM is implemented as a piecewise linear function, taking postsynaptic activity as input, which is defined by a sliding threshold,  $\theta$ , two inclinations ( $k_1, k_2$ ) and a saturation parameter  $\rho$  ( $\rho = 6$  throughout):

$$BCM(s) = \begin{cases} -k_1 s; & s \leq \theta/2 \\ k_1(s - \theta); & \theta/2 < s \leq \theta \\ k_2 \tanh(\rho(s - \theta))/\rho; & otherwise \end{cases} \quad (13)$$

The threshold is adjusted based on the postsynaptic activity:

$$\Delta \theta = 0.25(s^2 - \theta) \quad (14)$$

Value-independent plasticity was subject to weight normalization to prevent unbounded potentiation:

$$c_{ij} = \frac{c_{ij}}{\text{sqrt}\left(\sum_{k=1}^K c_{kj}^2\right)}; \quad (15)$$

where  $c_{ij}$  is a particular connection, and  $K$  is the total number of connections onto unit  $j$ .

The rule for value-dependent plasticity differs from the value-independent rule in that synaptic change is governed by the presynaptic activity, postsynaptic activity, and temporal difference from the value system. The synaptic change for value-dependent synaptic plasticity is given by:

$$\Delta c_{ij}(t+1) = \eta s_i(t) s_j(t) TD(t); \quad (16)$$

where  $TD(t)$  is the temporal difference value at time  $t$  (see Eq. 4).

1. Muller, R. U., Ranck, J. B., Jr., & Taube, J. S. (1996) *Curr. Opin. Neurobiol.* **6**, 196-206.
2. Taube, J. S. (1998) *Prog. Neurobiol.* **55**, 225-256.
3. Treves, A. & Rolls, E. T. (1994) *Hippocampus* **4**, 374-391.
4. Amaral, D. G., Ishizuka, N. & Claiborne, B. (1990) *Prog. Brain Res.* **83**, 1-11.
5. Bernard, C. & Wheal, H. V. (1994) *Hippocampus* **4**, 497-529.
6. Freund, T. F. & Buzsaki, G. (1996) *Hippocampus* **6**, 347-470.
7. Mogenson, G. & Nielsen, M. (1984) *Behav. Neural Biol.* **42**, 52-60.
8. Thierry, A. M., Gioanni, Y., Degenetais, E. & Glowinski, J. (2000) *Hippocampus* **10**, 411-419.
9. Sutton, R. S. & Barto, A. G. (1990) in *Learning and Computational Neuroscience: Foundations of Adaptive Networks*, ed. Moore, J. (MIT Press, Cambridge, MA), pp. 497-537.
10. Montague, P. R., Dayan, P. & Sejnowski, T. J. (1996) *J. Neurosci.* **16**, 1936-1947.
11. Grossberg, S. (1999) *Conscious Cogn.* **8**, 1-44.
12. Wray, J. & Edelman, G. M. (1996) *Cereb. Cortex* **6**, 701-716.
13. Bienenstock, E. L., Cooper, L. N. & Munro, P. W. (1982) *J. Neurosci.* **2**, 32-48.
